# Supplementary material for: Students with Autism Spectrum Disorder and Their Parents in the Transition into Higher Education: Impact on Dynamics in the Parent–Child Relationship
Source: Springer Nature journal article supplement (doi:10.1007/s10803-018-3593-y), 2018-05-02
Supplement: MOESM1 [file 15735256]

**Supplementary Material**

*Appendix A: Extract interview guide students and parents*

[Top Appendix A]

**Extract interview guide ‘student’**

**INTRODUCTION**

The transition from secondary to higher education brings along many changes. The purpose of this interview is to gain a better understanding of how you and your parents navigate this transition. We are interested in your experiences, in the challenges you have faced or still face, and in factors that contribute to a smooth transition. We would also like to focus on how this transition impacts the parent-child relationship. We would like to hear whether your mother and/or father are attentive and supportive for your needs.

**SECTION. COLLEGE ATTENDANCE**

*Introduction*

In this theme we would like to learn about your perception about college attendance. We are interested to hear why you want to attend college, and what your postsecondary goals are in this respect. We would also like to focus on the perceptions of your parents on this topic.

*Open-ended questions*

E.g., Why is it important for you to attend college? What are your postsecondary goals? Do you think your ASD has an important impact? Which steps did you take to prepare your enrollment? How did you choose the institution you are currently attending? How does your mother/father look upon college attendance? Do they have the same perceptions? In which way are they helpful to you? Have there been situations in which they have not been helpful to you?

*Prompts*

E.g., Do you look forward to attend college? What factors were crucial for your major and institution decision? What are the goals of your parents? Are they attentive and supportive for your goals?

**SECTION. TRANSITION IN DOMAIN OF EDUCATION**

*Introduction*

We will first focus on the domain of education, e.g. participating in classes, exams, studying, etc. We would like to know how you look upon these activities, and like to hear which challenges or difficulties arose/arise, and how you overcome/overcame specific difficulties. We would also like to know if you (will) look for support, and what your experiences are in this regard. We are also interested in your recommendations, and in the perceptions of your parents on this topic.

*Open-ended questions*

E.g., How do you experience the transition from high school into higher education? Do you expect issues in of participating in classes, completing assignments, studying, exams, etc.? Do you think your ASD has an important impact? How difficult will it be to manage these challenges? Will you ask your institution for support or help? Are there particular types of academic support that you wish to receive? Tell me about your support recommendations. Are your mother and/or father attentive and supportive for your needs?

*Prompts*

E.g., Do you think your ASD has an important impact? What are the greatest challenges? Do you plan to ask for support? Are their particular support measures that you want to receive? Is it easy to ask for assistance? Will you tell the academic staff about your ASD? If so, what are their reactions? Do they have an accurate perception of ASD? What are the reactions of your parents? Do they have an accurate perception of your challenges? In which way are they helpful to you? Have there been situations in which they have not been helpful to you?

**TRANSITION IN DOMAIN OF STUDENT LIFE**

*Introduction*

We will now focus on student activities on and outside the campus, e.g., activities run by student clubs, international exchanges, etc.. We would like to know how you look upon these activities, and like to hear which challenges or difficulties arose/arise, and how you overcome/overcame specific difficulties. We would also like to know if you look for support, and what your experiences are in this regard. We would also like to focus on the perceptions of your parents on this topic.

*Open-ended questions*

Will you engage you in any club or any other social activities? Are you expecting specific difficulties? Will you ask for support or help? What/who are important people/services/ that support you in student life? Which are the things that your college might offer to support students with ASD that would benefit certain aspects of student life? Tell me about your recommendations. What are the perceptions of your parents? Do they have an accurate perception of your challenges? In which way are they helpful to you? Have there been situations in which they have not been helpful to you?

*Prompts*

E.g., What do you experience as really challenging in student life? What are the greatest challenges? How difficult is it to manage these challenges? Do you think your ASD has an important impact on student life? Will you tell your fellow students about your ASD? Are there particular support services that are more supportive for you? Are there any particular support measures that you wish you to receive?

**SECTION DAILY (INDEPENDENT) LIVING**

*Introduction*

For many students, the transition to higher education also involves a change to independent living. In this topic we are interested to find out more about your opinions related to daily (independent) living. We would like to know if you are going to live independently, the types of challenges or difficulties that (will) arise, and how you (will) overcome specific difficulties. We would also like to know your support recommendations, and the perceptions of your parents on this topic.

*Open-ended questions*

Which tasks or situations do you find rather challenging? Which/who are important people/services/ that support you in your daily (independent) living? Which are issues that are really important for students with ASD? What are the general recommendations for services that regulate housing? What are your recommendations? What are the perceptions of your parents? Do they have an accurate perception of your challenges? In which way are they helpful to you? Have there been situations in which they have not been helpful to you?

*Prompts*

E.g., Which factors have had an important impact on your decision to live in residence? Which are the greatest challenges that you will be faced with? Will you tell your roommates about your ASD? Are there any particular support measures that you wish you to receive?

**CONLUSION**

Is there anything else that you would like to share with me about your transition experience?

**Extract interview guide ‘parents’**

**INTRODUCTION**

The transition from secondary to higher education brings along many changes. The purpose of this interview is to gain a better understanding of how you perceive the transition as parent. We are interested in your experiences, in the challenges you have faced or still face, and in factors that contribute to a smooth transition. We would also like to focus on how this transition impacts the parent-child relationship. We would like to hear how you are attentive and supportive for the needs of your child.

**SECTION. COLLEGE ATTENDANCE**

*Introduction*

In this theme we would like to learn about your perception about college attendance. We are interested to hear if you find it important that your child attends college, and what your expectations are in this respect. We would also like to focus on the perceptions of your son/daughter on this topic.

*Open-ended questions*

E.g., Why is it important for you that your child attends college? How does your child perceive the move to college? What are his/her postsecondary goals? What are your postsecondary goals? Do you think his/herASD has an important impact?

*Prompts*

E.g., Do you look forward that your child attends college? What are his goals? What are your goals?

**SECTION. TRANSITION IN THE DOMAIN OF EDUCATION**

*Introduction*

We will first focus on the domain of education, e.g. participating in classes, exams, studying, etc. We would like to know how you look upon these activities, and like to hear which challenges or difficulties arose/arise, and how you support your child with his/her specific difficulties. We would also like to hear what your experiences are in this regard. We are also interested in your recommendations. We would also like to focus on how this topic impacts the parent-child relationship. We would like to hear how you are attentive and supportive for the needs of your child.

*Open-ended questions*

E.g., How do you experience the transition from high school into higher education? Which steps did you take to prepare the enrollment? What steps did your child take? How did you choose the major and the institution? Do you expect issues in of participating in classes, completing assignments, studying, exams, etc.? How difficult will it be to manage these challenges? Are there particular types of academic support that are needed? Tell me about your support recommendations. We would also like to focus on how this topic impacts the parent-child relationship. We would like to hear how you are attentive and supportive for the needs of your child.

*Prompts*

E.g., What factors were crucial for your major decision? Do you think your ASD has an important impact? What are the greatest challenges? Is support needed? In which way are you helpful for your son/daughter?

**TRANSITION IN THE DOMAIN OF STUDENT LIFE**

*Introduction*

Now, we will focus on student activities on and outside the campus (e.g., activities run by student clubs, international exchanges, etc.). We would like to know how you look upon these activities, and like to hear which challenges or difficulties arose/arise, and how you overcome/overcame specific difficulties. We would also like to know if you look for support, and what your experiences are in this regard.

*Open-ended questions*

Are you expecting specific difficulties? How difficult will it be to manage these challenges? Are there particular types of support that are needed? Tell me about your support recommendations. We would also like to focus on how this topic impacts the parent-child relationship. We would like to hear how you are attentive and supportive for the needs of your child.

*Prompts*

E.g., What are the greatest challenges? Do you think your ASD has an important impact on student life? Are there particular support services that are more supportive? Have there been situations in which you have not been helpful to you?

**SECTION DAILY (INDEPENDENT) LIVING**

*Introduction*

For many students, the transition to higher education also involves a change to independent living. In this topic we are interested to find out more about your opinions related to daily (independent) living. We would like to your opinion on the types of challenges or difficulties that (will) arise. We would also like to know your support recommendations. We would also like to focus on how this topic impacts the parent-child relationship. We would like to hear how you are attentive and supportive for the needs of your child.

*Open-ended questions*

Which tasks or situations do you find rather challenging? Which/who are important people/services/ that support your child in daily (independent) living? Which are issues that are really important for students with ASD? What are the general recommendations for services that regulate housing? What are your recommendations? We would also like to focus on how this topic impacts the parent-child relationship. We would like to hear how you are attentive and supportive for the needs of your child.

*Prompts*

E.g., Which factors have had an important impact on your decision to live in residence? Which are the greatest challenges that you will be faced with? Will you tell your roommates about your ASD? Are there any particular support measures that you wish you to receive?

**CONLUSION**

Is there anything else that you would like to share with me about your transition experience?
